# Supplementary material
Source: MDPI journal article supplement (https://www.mdpi.com/2673-7140/1/4/17)
Supplement: s1 [file s1]

## Article

# Utilization of tomato landraces to improve seedling performance under salt stress

Kalliopi Kadoglidou<sup>1</sup>, Aliko Xanthopoulou<sup>1</sup>, Apostolos Kalyvas<sup>1</sup>, Ifigeneia Mellidou<sup>1\*</sup>

<sup>1</sup> 1Institute of Plant Breeding and Genetic Resources, Hellenic Agricultural Organization DEMETER (ex NAGREF), Thessaloniki, Macedonia GR-57001, Greece; kadoglidou@ipgrb.gr; aliki.xanthopoulou@gmail.com; kalyvas@ipgrb.gr; imellidou@ipgrb.gr

\* Correspondence: imellidou@ipgrb.gr

**Table S1.** Details on the tomato germplasm collection used in the study to evaluate salt responses. TGRC, Tomato Genetic Resources Center; HAO DEMETER, Hellenic Agricultural Organization.

| Genotype                   | Code   | Type                                          | Salinity tolerant | Source of origin | Geographic origin |
|----------------------------|--------|-----------------------------------------------|-------------------|------------------|-------------------|
| <i>S. pimpinellifolium</i> | LA1579 | wild accession                                | yes               | TGRC             | Gene Bank         |
| Ailsa Craig                | AC     | model cultivar                                | no                | TGRC             | Gene Bank         |
| LA4102                     | IL12-4 | introgression line                            | unknown           | TGRC             | Gene Bank         |
| SANTORINI                  | V1     | landrace                                      | unknown           | HAO DEMETER      | Aegean Sea        |
| ZAKINTHOS                  | V2     | landrace                                      | unknown           | HAO DEMETER      | Ionian Sea        |
| PAXOI                      | V3     | landrace                                      | unknown           | HAO DEMETER      | Ionian Sea        |
| HL073                      | V4     | landrace                                      | unknown           | HAO DEMETER      | Crete, Greece     |
| AGIOU OROUS                | V5     | landrace                                      | unknown           | HAO DEMETER      | Macedonia, Greece |
| MAKEDONIA                  | V6     | commercial cultivar originated from landraces | unknown           | HAO DEMETER      | Macedonia, Greece |

**Table S2.** Results of analysis of variance applied on growth and physiological parameters of tomato seedlings of different genotypes as affected by salinity treatment. F-ratios' significance is given for the effects exerted by tomato's genotype and salinity treatment.

| Variation Source    | df <sup>z</sup> | Significance of F-ratio |                 |               |          |         |           |          |       |       |       |       |       |       |      |        |            |      |
|---------------------|-----------------|-------------------------|-----------------|---------------|----------|---------|-----------|----------|-------|-------|-------|-------|-------|-------|------|--------|------------|------|
|                     |                 | Shoot Length            | Shoot Thickness | Leaves Number | Shoot FW | Root FW | Shoot DMC | Root DMC | RGR   | CCI   | TR    | SC    | Anet  | REL   | AsA  | totAsA | AsA/totAsA | MDA  |
| <b>Genotype (G)</b> | 8               | **                      | **              | **            | **       | **      | **        | **       | **    | **    | **    | **    | **    | *     | **   | **     | **         | **   |
| <b>Salinity (S)</b> | 1               | **                      | **              | **            | **       | **      | NS        | **       | **    | **    | **    | **    | **    | **    | **   | **     | **         | **   |
| <b>G x S</b>        | 8               | **                      | **              | NS            | NS       | NS      | **        | **       | NS    | **    | **    | **    | **    | NS    | **   | **     | **         | **   |
| <b>CV%</b>          |                 | 9.33                    | 7.20            | 12.40         | 15.34    | 17.66   | 6.02      | 10.01    | 21.88 | 25.03 | 20.19 | 17.21 | 15.50 | 11.33 | 9.86 | 8.82   | 7.60       | 3.73 |

z df, degree of freedom; FW, fresh Weight; DW, dry weight; DMC, dry matter content (%); RGR, relative growth rate; CCI, chlorophyll content index; TR, transpiration rate, SC, stomatal conductance Anet, net photosynthetic rate; REL, root electrolyte leakage; MDA, content of malondialdehyde; AsA, ascorbic acid; tot AsA, total ascorbic acid; CV, Coefficient of Variance; \*\*, significance at  $p < 0.01$ ; \*, significance at  $p < 0.05$ ; NS, nonsignificant.

**Table S3.** Tolerance indices stress susceptibility index (SSI) and salt tolerance index (STI) of the above-the-ground and total biomass of nine tomato genotypes subjected to 200 mM NaCl for 10 days.

| Genotypes | Above-the-ground |       | Total |       |
|-----------|------------------|-------|-------|-------|
|           | SSI              | STI   | SSI   | STI   |
| LA1579    | 0.432            | 0.427 | 0.468 | 0.465 |
| AC        | 0.853            | 0.3   | 0.803 | 0.434 |
| IL12-4    | 0.772            | 0.313 | 0.845 | 0.433 |
| V1        | 0.604            | 0.515 | 0.723 | 0.719 |
| V2        | 1.029            | 0.259 | 0.918 | 0.243 |
| V3        | 1.05             | 0.388 | 0.99  | 0.552 |
| V4        | 1.246            | 0.396 | 1.131 | 0.599 |
| V5        | 1.482            | 0.263 | 1.816 | 0.314 |
| V6        | 0.796            | 0.425 | 0.737 | 0.592 |
